# Supplementary material
Source: publisher figshare collection journal article supplement (https://geolsoc.figshare.com/ndownloader/files/5426618)
Supplement: Supplementary file 1 [file 5426618]

Table 2: Boron isotope values of Tur from UHPM rocks determined by SIMS in this study
Locality	Kokchetav(Kazakhstan)			Erzgebirge(Germany)
Sample	K86	G31		R6a		R6b
Domain	core	core	rim	core	rim	core	mantle(UHP)	rim(ret)
Type	A2	B	B	B	B	A1	A1	B
d11B	-7.4	9.4	6.5	-7.2	-10.5	-15	-14.7	-13.2
2RSD_mean	0.7	0.4	1	0.3	0.8	0.2	0.3	0.5
n	9	11	6	12	7	12	15	7
2RSD_mean = 2 x relative standard deviation of the mean; n = number of isotope analyses.
